# Supplementary material
Source: Springer Nature journal article supplement (https://www.springermedizin.de/resource/supplementary/12876_2014_1165_MOESM1_ESM.pdf/9438248)
Supplement: MOESM1 [file 9438248]

## METRIC (MR Enterography or uTRAsound In Crohn's disease)

### Trial Flow Diagram

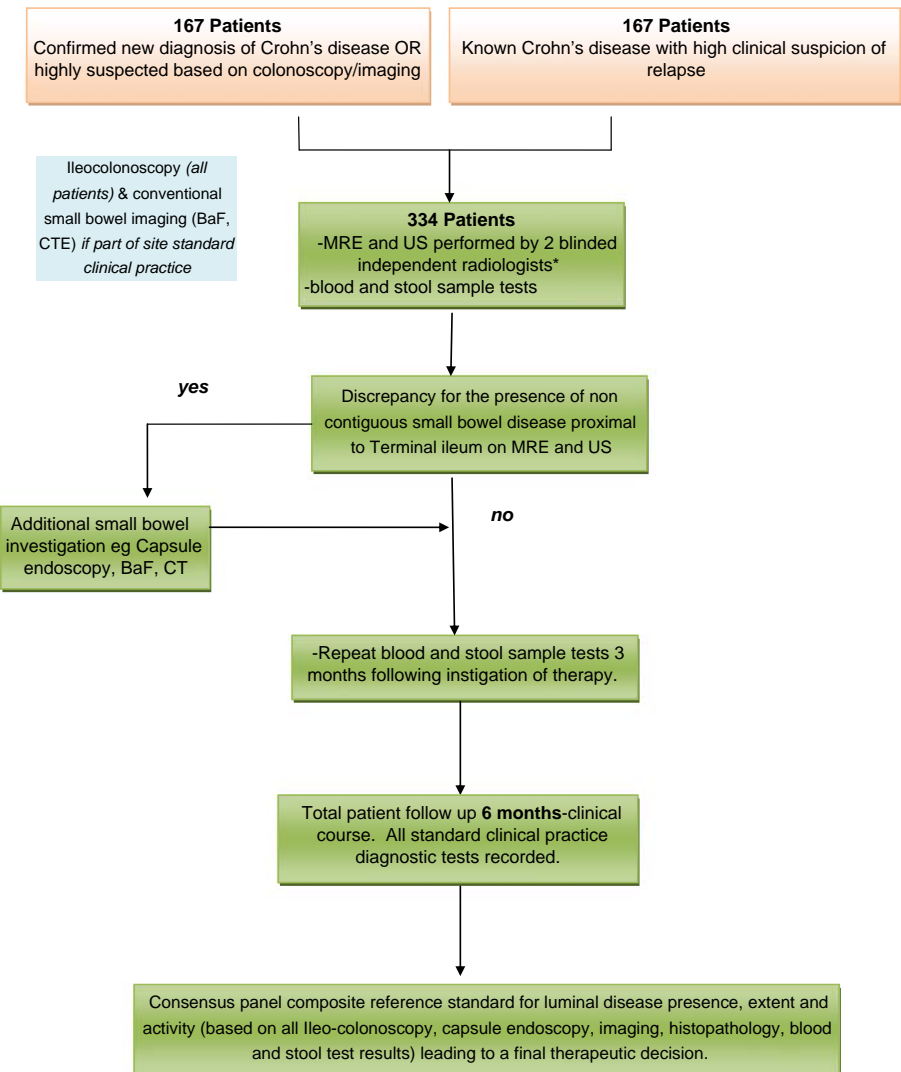

\* IF MRE already performed pre recruitment-blinded radiologist review  
If US already performed pre recruitment-repeated by blinded radiologists
